## **Frontal cortex tracks surprise separately for different sensory modalities but engages a common inhibitory control mechanism**

*Short title:* Cross-modal surprise and inhibitory control

Jan R. Wessel<sup>1,2</sup> & David E. Huber<sup>3</sup>

1 Department of Psychological and Brain Sciences, University of Iowa, Iowa City IA 52245

2 Department of Neurology, University of Iowa Hospitals and Clinics, Iowa City IA 52242

3 Department of Psychological and Brain Sciences, University of Massachusetts, Amherst MA 01003

### Corresponding author address:

Jan R. Wessel, Ph.D.

UIHC Neurology, 444 Medical Research Center

200 Hawkins Drive, Iowa City, IA 52242

Tel.: +1 319 335 2482

Email: Jan-Wessel@uiowa.edu, Web: [www.wessellab.org](http://www.wessellab.org)

## 1 **Abstract**

2           The brain constantly generates predictions about the environment to guide action.  
3 Unexpected events lead to surprise and can necessitate the modification of ongoing behavior.  
4 Surprise can occur for any sensory domain, but it is not clear how these separate surprise signals  
5 are integrated to affect motor output. By applying a trial-to-trial Bayesian surprise model to  
6 human electroencephalography data recorded during a cross-modal oddball task, we tested  
7 whether there are separate predictive models for different sensory modalities (visual, auditory),  
8 or whether expectations are integrated across modalities such that surprise in one modality  
9 decreases surprise for a subsequent unexpected event in the other modality. We found that  
10 while surprise was represented in a common frontal signature across sensory modalities (the  
11 fronto-central P3 event-related potential), the single-trial amplitudes of this signature more  
12 closely conformed to a model with separate surprise terms for each sensory domain. We then  
13 investigated whether surprise-related fronto-central P3 activity indexes the rapid inhibitory  
14 control of ongoing behavior after surprise, as suggested by recent theories. Confirming this  
15 prediction, the fronto-central P3 amplitude after both auditory and visual unexpected events was  
16 highly correlated with the fronto-central P3 found after stop-signals (measured in a separate  
17 stop-signal task). Moreover, surprise-related and stopping-related activity loaded onto the same  
18 component in a cross-task independent components analysis. Together, these findings suggest  
19 that medial frontal cortex maintains separate predictive models for different sensory domains,  
20 but engages a common mechanism for inhibitory control of behavior regardless of the source of  
21 surprise.

## 22 **Author summary**

23            Surprise is an elementary cognitive computation that the brain performs to guide  
24 behavior. We investigated how the brain tracks surprise across different senses: Do unexpected  
25 sounds make subsequent unexpected visual stimuli less surprising? Or does the brain maintain  
26 separate expectations of environmental regularities for different senses? We found that the  
27 latter is the case. However, even though surprise was separately tracked for auditory and visual  
28 events, it elicited a common signature over frontal cortex in both sensory domains. Importantly,  
29 we observed the same neural signature when actions had to be stopped after non-surprising  
30 stop-signals in a motor inhibition task. This suggests that this signature reflects a rapid  
31 interruption of ongoing behavior when our surroundings do not conform to our expectations.

32

## 33 1. Introduction

34 Surprise occurs when expectations about the multi-sensory environment are violated. It  
35 provides an elementary cognitive and physiological process that forms the backbone of many  
36 influential theories of cognitive processing and control (1-5). The rapid modification of ongoing  
37 actions after surprise is critical for effective goal-directed behaviors (6, 7). For example, while  
38 eating berries, one needs to rapidly stop ongoing actions when encountering a berry that looks,  
39 smells, or feels surprising, lest one eats a rotten berry. However, the manner in which the brain  
40 tracks surprise across different sensory domains is not fully understood.

41 Prior imaging work has shown that unexpected events, regardless of their sensory  
42 modality, activate similar brain networks (8-11). In line with this, scalp-electroencephalography  
43 (EEG) shows that unexpected events are followed by a modality-independent fronto-central P3  
44 event-related potential (12, ERP, 13). The canonical neural response to surprise across modalities  
45 could indicate that the brain integrates environmental information across modalities and  
46 generates global predictions that form the basis of surprise-processing. Alternatively, surprise  
47 might result from separate, independent predictions for each sensory domain. In this latter case,  
48 the modality-independent surprise response could index a common set of downstream  
49 mechanisms triggered by surprise, regardless of sensory domain.

50 In the current study, we tested these two alternatives against each other. While  
51 performing a cross-modal oddball task (CMO, 14), human subjects were presented with visual or  
52 auditory unexpected events. Using the statistics of the trial sequence, we constructed two  
53 models of Bayesian surprise (5). In one model, surprise-values were separately coded for each  
54 sensory domain (i.e., an unexpected sound did not reduce surprise of a subsequent unexpected

55 visual event). In the alternative model, surprise was coded in a common term across modalities  
56 (i.e., an unexpected sound reduced surprise for a subsequent unexpected visual event). We fit  
57 both models to the trial-to-trial electroencephalographic response to unexpected events at each  
58 of 64 scalp-sites to determine which model better represents the neural surprise response.

59 As mentioned above, in case this trial-to-trial modeling of the neural surprise response  
60 suggests that surprise-terms are computed separately for each sensory domain (i.e., surprise is  
61 not integrated into a common model), the expected cross-modal overlap in neural response may  
62 be explained by a common, supra-modal control mechanism that is triggered by surprise,  
63 regardless of modality. Therefore, in a second step, we aimed to test the hypothesis that the  
64 fronto-central P3 after unexpected events indexes the modality-independent activation of a  
65 cognitive control mechanism aimed at inhibiting ongoing behavior. This hypothesis was recently  
66 proposed in a theoretical framework claiming that surprise automatically engages the same  
67 motor inhibition mechanism that is recruited when ongoing actions have to be stopped (15). The  
68 activity of this mechanism can be measured in the stop-signal task (SST, 16), where fronto-central  
69 P3 activity following (non-surprising) stop-signals indexes the speed of motor inhibition (17, 18).  
70 To determine whether the fronto-central P3 after unexpected events in the CMO task and the P3  
71 after stop-signals in the SST reflect the same process, we first correlated their amplitudes across  
72 tasks and subjects. We hypothesized that if they indeed reflect the same process, their  
73 amplitudes should be positively correlated. Additionally, we used independent component  
74 analysis to determine if both fronto-central waveforms load onto a common independent  
75 component (19, 20). In doing so, we aimed to provide converging support for the proposal that

76 surprise-signals in frontal cortex lead to the automatic activation of a control process that aims  
77 to inhibit ongoing behavior, independent of the modality of the unexpected event.

78

## 79 **2. Materials and Methods**

### 80 *2.1. Participants*

81 Fifty-five healthy young adult volunteers from the Iowa City community were recruited  
82 via a research-dedicated email list, as well as through the University of Iowa Department of  
83 Psychological and Brain Sciences' online subject recruitment tool. The sample consisted of thirty-  
84 one females and twenty-four males (mean age: 20.9 y, SEM: 0.05, range 18-31), eight of them  
85 left-handed. Participants were compensated with course credit or an hourly payment of \$15. The  
86 procedure was approved by the University of Iowa Institutional Review Board (#201612707).

87

### 88 *2.2. Materials*

89 Stimuli for both tasks were presented using the Psychophysics toolbox (21)  
90 (RRID:SCR\_002881) under MATLAB 2015b (TheMathWorks, Natick, MA; RRID:SCR\_001622) on an  
91 IBM-compatible computer running Fedora Linux. Visual stimuli were presented on an ASUS  
92 VG278Q low-latency flat screen monitor, while sounds were played at conversational volume  
93 through speakers positioned on either side of the monitor. Responses were made using a  
94 standard QWERTY USB-keyboard.

95

### 96 *2.3. Cross-Modal Oddball task*

97           Each trial began with a central white fixation cross on black background (500ms), which  
98   was followed by an audio-visual cue (Figure 1). Participants were instructed that this cue would  
99   be informative regarding the timing of a subsequent target stimulus (a left- or rightward white  
100   arrow) that they would have to respond to. Participants were instructed that the cue would  
101   consist of a green circle presented in place of the fixation cross for 200ms, accompanied by a  
102   600Hz sine wave tone of 200ms duration. After cue presentation, the fixation cross reappeared  
103   for 300ms, followed by the target (i.e., the target appeared exactly 500ms after cue onset).  
104   Participants were instructed to respond to the target as fast as possible. Target responses were  
105   collected through the keyboard (q for leftward and p for rightward arrows) with the index finger  
106   of the respective hand. Participants had 1,000ms to respond to the target, after which the fixation  
107   cross reappeared and the inter-trial interval began. The duration of the inter-trial interval lasted  
108   until 2,500ms from the initial onset of the fixation cross (beginning of the trial) was reached.  
109   Furthermore, to prevent predictable trial initiation timing, a variable-length jitter was added to  
110   the ITI (100 – 500ms in 100ms increments, uniform distribution), resulting in an overall trial  
111   duration ranging from 2,600ms to 3,000ms.

112           After 10 practice trials without any unexpected cues, participants performed 240 trials,  
113   spread across 4 blocks. During this experimental trials, 80% of trials contained cues that were as  
114   described above (hereafter referred to as standard cues). On 10% of trials, the sine-wave tone  
115   was replaced with one of 120 unique birdsong segments, which were matched in amplitude and  
116   duration to the sine-wave tone (unexpected auditory cue). For these auditory unexpected cues,  
117   the visual part of the cue remained the same as for standard trials. On the remaining 10% of trials,  
118   the green circle was replaced by one of seven different geometric shapes (upwards/downwards

119 triangle, square, diamond, cross, hexagon, or a serifed “I”-shape) in one of 15 different non-green  
120 colors spread across the RGB spectrum (unexpected visual cue, cf. Figure 1). For these visual  
121 unexpected cues, the auditory part of the cue remained the same as for standard trials. Trials  
122 were presented in pseudorandom order, with the following constraints: the three first trials of  
123 each block had to contain standard cues; no two consecutive unexpected-cue trials were allowed  
124 to occur; and each block had to have the same number of unexpected auditory and visual cues.

125

#### 126 *2.4. Stop-signal task*

127 Trials began with a white fixation cross on a gray background (500ms duration), followed  
128 by a white leftward- or rightward-pointing arrow (go-signal). Participants had to respond as fast  
129 and accurately as possible to the arrow by using their left or right index finger as indicated by the  
130 direction of the arrow (the respective response-buttons were q and p on the QWERTY keyboard).  
131 On 33% of trials, a stop-signal occurred (the arrow turned from white to red) at a delay after the  
132 go-stimulus (stop-signal delay, SSD). The SSD, which was initially set to 200ms, was dynamically  
133 adjusted in 50ms increments to achieve a  $p(\text{stop})$  of .5: after successful stops, the SSD was  
134 increased; after failed stops, it was decreased. This was done independently for leftward and  
135 rightward go-stimuli: SSD started at 200ms for both left- and right-arrow trials. Then, if a stop-  
136 trial with a leftward arrow lead to a failed stop, the SSD for the next leftward arrow was  
137 decreased by 50ms, whereas the SSD for the next rightward response remained unchanged. This  
138 way, the SSD was allowed to vary independently for each arrow/response direction. Trial  
139 duration was fixed at 3000ms. Six blocks of 50 trials were performed (200 go, 100 stop). Before  
140 the main experiment, subjects practiced the task for 24 trials (16 go, 8 stop).



141

## CROSS-MODAL ODDBALL TASK

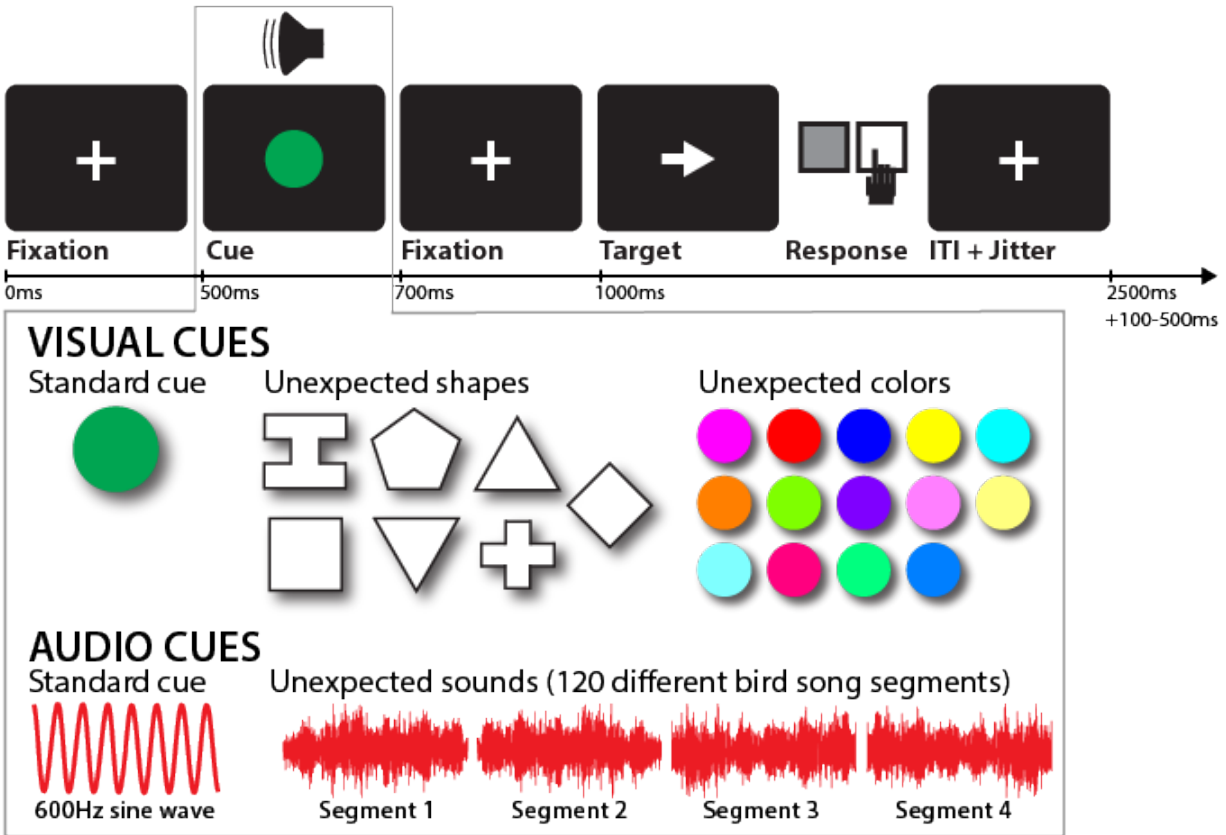

142

143 **Figure 1.** Cross-modal oddball task diagram. The top row depicts the trial timing. The gray box  
144 attached to the cue illustrates the different cue properties by trial type. Each cue consisted of a  
145 visual and an auditory component. Standard visual cues consisted of a green circle, whereas  
146 unexpected visual cues were one of seven non-circular shapes shown in one of fourteen non-green  
147 colors. Standard auditory cues consisted of a 600Hz sine wave, whereas unexpected auditory cues  
148 were one of 120 individual unique birdsong segments. On a trial that contained an unexpected  
149 cue in one domain, the part of the cue always contained the standard component.

150

151 2.5. Code availability

152 All analysis code, as well as the task code, can be downloaded alongside the raw data at  
153 the following URL: [to be inserted upon acceptance].

154

## 155 *2.6. Behavioral analysis*

156 For the CMO task, we quantified mean reaction time (RT), mean error rate (wrong button  
157 pressed), and mean miss rate (no response made within 1,000ms after target onset) for each of  
158 the three trial types (standard cue, unexpected auditory cue, unexpected visual cue). We  
159 analyzed these dependent variables using a 3 x 4 repeated-measures ANOVA with the factors  
160 TRIAL TYPE (1-3) and BLOCK (1-4). In case of a significant interaction, we performed follow-up  
161 paired-samples t-tests that compared each of the two unexpected cue conditions to the standard  
162 cue condition separately for each of the four blocks, resulting in eight total tests. The alpha-level  
163 for these comparisons was corrected using the Bonferroni correction to a corrected alpha  
164 of .0063 (i.e.,  $p = .05 / 8$ ).

165 For the stop-signal task, we examined the following measures: mean Go-trial RT, mean  
166 failed-stop trial RT, and mean stop-signal RT (SSRT; computed using the integration method,  
167 Verbruggen & Logan, 2009; Boehler et al., 2014).

168

## 169 *2.7. EEG recording*

170 EEG was recorded using a 62-channel electrode cap connected to two BrainVision MRplus  
171 amplifiers (BrainProducts, Garching, Germany). Two additional electrodes were placed on the  
172 left canthus (over the lateral part of the orbital bone of the left eye) and over the part of the

173 orbital bone directly below the left eye. The ground was placed at electrode Fz, and the reference  
174 was placed at electrode Pz. EEG was digitized at a sampling rate of 500 Hz.

175

## 176 *2.8. EEG preprocessing*

177 The CMO and SST datasets were preprocessed separately, using custom routines in  
178 MATLAB, incorporating functions from the EEGLAB toolbox (22). The channel \* time-series  
179 matrices for each task were imported into MATLAB and then filtered using symmetric two-way  
180 least-squares finite impulse response filters (high-pass cutoff: .3 Hz, low-pass cutoff: 30 Hz). Non-  
181 stereotyped artifacts were automatically removed from further analysis using segment statistics  
182 applied to consecutive one-second segments of data (joint probability and joint kurtosis, with  
183 both cutoffs set to 5 SD, cf., 23). After removal of non-stereotypic artifacts, the data were then  
184 re-referenced to common average and subjected to a temporal infomax ICA decomposition  
185 algorithm (24), with extension to subgaussian sources (25). The resulting component matrix was  
186 screened for components representing eye-movement and electrode artifacts using outlier  
187 statistics and non-dipolar components (residual variance cutoff at 15%, 26), which were removed  
188 from the data. The remaining components (an average of 17.1 per subject) were subjected to  
189 further analyses.

190

## 191 *2.9. Experimental design and statistical tests (EEG analysis)*

### 192 2.9.1. Hypothesis 1 – Cross-modal representation of surprise

193 To investigate whether surprise is represented separately for each sensory domain, we  
194 constructed two Bayesian surprise terms on a trial-by-trial basis, based on the trial sequences for

195 each subject (cf. Figure 2). For both terms, the surprise value associated with an unexpected cue  
196 on a particular trial was based on the following equation:

$$197 \quad \text{Surprise}_i = \log_2 \left( \frac{p_{\text{unexpected\_cue}}(1 \dots i)}{p_{\text{unexpected\_cue}}(1 \dots i - 1)} \right)$$

198 This equation corresponds to the trial-wise Kullback-Leibler divergence between the prior  
199 probability of an unexpected cue (denominator) and the posterior probability of an unexpected  
200 cue (numerator). This value is bounded between 0 (posterior = prior -> no surprise) and 1  
201 (maximum surprise). Since this value is not defined on the first occurrence of an unexpected cue  
202 (where the prior is zero, leading to a division by 0), the surprise value for that trial was set to 1  
203 (maximum surprise).

204 Based on this equation, we generated two different models. In Model 1 (separate surprise  
205 terms, Figure 2A), values for each sensory domain were calculated separately. In other words,  
206 the first time the subject encountered an unexpected auditory cue in the trial sequence, the  
207 surprise for that trial was 1. Subsequent unexpected auditory cues then produced lower surprise  
208 values as the posterior and prior probabilities of unexpected auditory cues converge on the same  
209 value (i.e., as the ratio approaches 1, the log approaches 0) with increasing numbers of previous  
210 unexpected auditory cues. Critically, these prior and posterior probabilities for *auditory* cues are  
211 calculated without reference to the number of prior unexpected *visual* cues. Thus, once a subject  
212 encounters the first unexpected *visual* cue, the surprise value for that trial is again 1 (maximum  
213 surprise). Hence, the prior for each sensory domain is unaffected by the occurrence of  
214 unexpected cues in the other sensory domain.<sup>1</sup>

---

<sup>1</sup> This formulation of Model 1 assumes statistical independence in calculating these probabilities. However, the two kinds of unexpected cues were not statistically independent in the experimental design, as no trial included

215 In contrast to Model 1, Model 2 (common surprise term, Figure 2B) extracted a combined  
216 surprise value, calculated without reference to sensory domain. In other words, the prior and  
217 posterior probabilities are based on the number of unexpected cues, regardless of whether those  
218 cues were visual or auditory.

### MODEL 1: SEPARATE SURPRISE TERMS

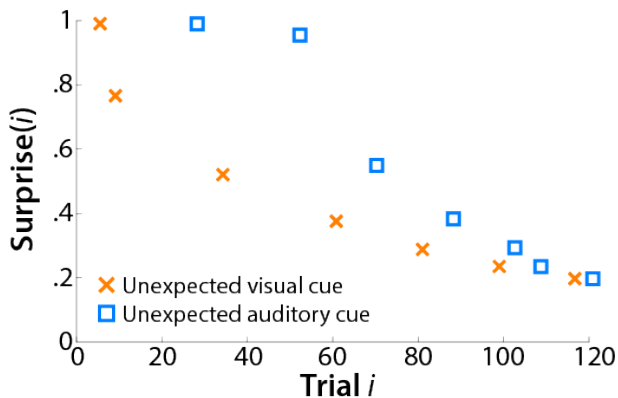

### MODEL 2: COMMON SURPRISE TERMS

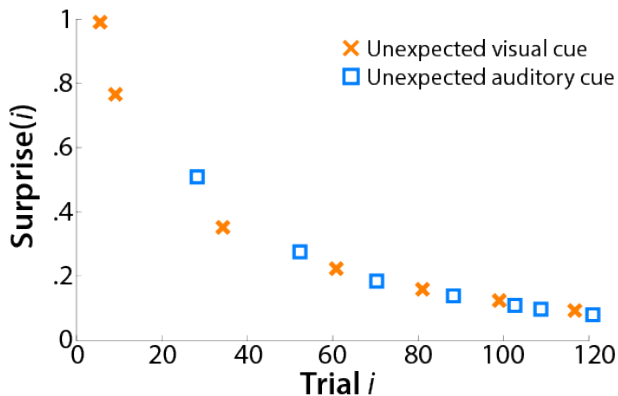

219  
220 **Figure 2.** Single-subject example of surprise-term construction for each model. Top: Model 1 uses  
221 separate surprise terms for each sensory domain. In effect, the presence of a surprising event in  
222 one sensory domain does not inform the prior in the other sensory domain. Bottom: Model 2 uses

---

unexpected cues for both sensory domains. To address this, we investigated an alternative formulation of Model 1 that respected this mutual exclusivity inherent in the experimental design. For example, upon realizing that the current trial contained an expected visual cue, this increases the prior probability for an unexpected auditory cue. It is not clear whether subjects could have reasonably learned this mutual exclusivity. Regardless of the formulation of Model 1, the first unexpected event for either modality is maximally surprising (as a result, this alternative formulation of Model 1 was nearly identical to the reported version, which assumed statistical independence).

223 *a combined surprise term across both domains. In effect, all unexpected events, regardless of*  
224 *domain, influence the construction of the prior.*

225

226         These values were then used to model the whole-brain event-related single-trial EEG  
227 response on all trials that contained unexpected cues. This was done using procedures reported  
228 by Fischer and Ullsperger (27). For each subject, sixty-four matrices (one for each EEG channel)  
229 were generated that contained the event-related EEG response for each individual trial with an  
230 unexpected cue (24 auditory, 24 visual = 48), measured in 10 consecutive time windows covering  
231 the entire cue-target interval (500ms, Figure 3). The time windows were centered around time  
232 points ranging from 50 to 500ms and were 48ms long (24ms before and after the exact time  
233 point). EEG activity within each time window was averaged for each trial (prior to averaging, the  
234 single-trial data were baseline-corrected by subtracting the activity ranging from 100ms – 0ms  
235 relative to the cue). Hence, this resulted in a matrix of 48 (trials) \* 10 (time points) for each  
236 channel (unless trials were excluded because of artifacts); cf. the blue matrix in Figure 3. Both of  
237 the two candidate surprise models constructed from the Bayesian equation were then applied to  
238 these EEG matrices. In applying the models, both the surprise terms and EEG response were z-  
239 scored (to standardize the resulting beta weights) and the model terms were regressed onto each  
240 time-window vector of the trial by time window EEG response matrix. This was done using  
241 MATLAB's `robustfit()` function, which performs a linear regression that is robust to outliers.

242         The resulting matrix of beta values was tested against 0 (using paired-samples t-tests for  
243 the beta values, with subject as the random factor) at each channel and time point separately.  
244 This identified channels and time periods at which the respective model surprise terms reliably

245 captured variability in the EEG signal. This resulted in two sets of 64 (channels) \* 10 (time points)  
 246 = 640 individual tests (one set for each model). To test which model provided a superior fit of the  
 247 neural data at each channel and time-point, the resulting beta weights from each model also  
 248 tested against each other, producing a third set of 640 paired-samples t-test (again with subject  
 249 as the random factor).

250 To correct for multiple comparisons across these three sets of 640 t-tests, we adjusted  
 251 the alpha-level using the false discovery rate correction procedure (FDR, 28) based on a family-  
 252 wise alpha-level of .01. This resulted in an adjusted alpha-level of  $p = .00044$ . A detailed graphical  
 253 illustration of this overall analysis strategy can be found in Figure 3.

254

## SINGLE-TRIAL MODEL-BASED EEG ANALYSIS: SCHEMATIC OVERVIEW

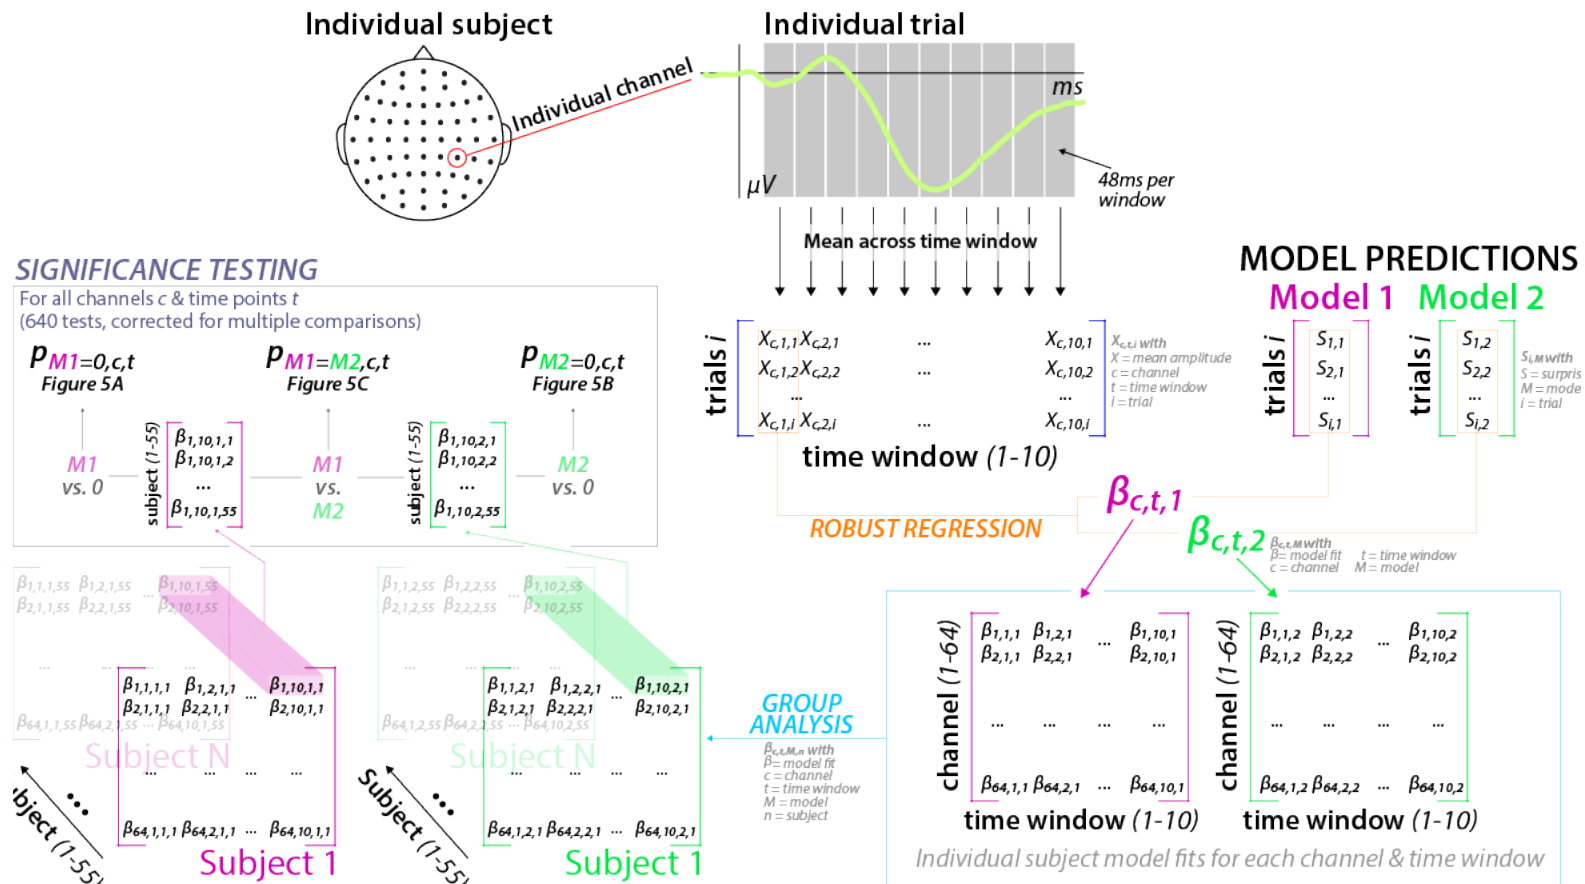

255 **Figure 3.** Schematic overview of the single-subject, single-trial robust regression analysis,  
256 mapping surprise terms from two models onto the whole brain EEG response to unexpected cues  
257 (as well as performing a model comparison). Clockwise from the top-left: For each individual  
258 channel, the trial-by-trial event-related response was averaged within 10 consecutive time  
259 windows following onset of an unexpected cue. This resulted in a matrix of 48 trials by 10 time  
260 windows of EEG amplitude values for each subject (one for each channel; blue brackets). Each  
261 subject's individual model terms for both models (pink and green brackets on the top right) were  
262 then correlated with each of the trial-vectors for each time window using robust regression  
263 (orange line). The resulting beta values were stored in one channel by time window matrix for  
264 each subject and model (bottom right). These beta weights were subjected to group-level  
265 analyses across subjects (bottom left), with each channel by time window combination (640  
266 unique combinations per model) tested against 0 for each model separately (purple box), with  
267 paired samples t-tests using subject as the random factor.

268

269 In a separate exploratory analysis of the trial-to-trial reaction times, we similarly  
270 regressed the surprise terms from each model onto the response latencies for each target  
271 stimulus to assess whether surprise, according to each model, predicted slower responses.

272

### 273 2.9.2. Hypothesis 2 – Surprise-related frontal cortex activity reflects inhibitory control

274 In addition to our above-described test of whether surprise is represented in the brain  
275 separately for each sensory domain, we also tested whether the predicted fronto-central neural  
276 response to unexpected cues (i.e., the P3) reflects an inhibitory control signal aimed at inhibiting



277 ongoing behavior during surprise. To this end, we employed cross-task comparisons between the  
278 fronto-central P3 extracted for each subject from the CMO task and a separate ‘functional  
279 localizer’ task – the stop-signal task – which all subjects performed after the CMO task (subjects  
280 performed the SST after the CMO task so they were not biased to use inhibitory control in the  
281 CMO task). We used two different approaches to compare activity across tasks: amplitude  
282 correlations and independent component analysis (ICA).

283

#### 284 *2.9.2.1. Amplitude correlations (Approach 1).*

285 In the first approach, we assessed correlations between EEG amplitudes across tasks.  
286 More specifically, if the fronto-central signals from each task reflect the same brain process, they  
287 should be positively correlated (e.g., a subject with a more pronounced stop-signal P3 should also  
288 show a larger P3 to unexpected cues in the CMO task). However, positive correlations might arise  
289 from a variety of nuisance variables (e.g., better signal-to-noise ratio for some subjects compared  
290 to others), and these alternatives were addressed by comparing these correlations with various  
291 control correlations.

292 To perform our correlation analyses, for each subject, we extracted the amplitudes of  
293 several trial-averaged event-related potentials (ERPs) from both tasks, all of which were averaged  
294 from -100 to 700ms with respect to the time-locking event (and baseline corrected from -100 to  
295 0ms):

296

#### 297 1. ERPs of interest:

- 298 - Fronto-central P3 following the stop-signal on successful stop-trials in the SST

299 - Fronto-central P3 following visual or auditory unexpected cues in the CMO task.

300

301 2. Control ERPs:

302 - posterior occipital (visual) N1 to the arrow stimuli in both tasks (i.e., to the Go-signal  
303 in the SST and to the target-arrow in the CMO task).

304 - Fronto-central P3 following standard cues in the CMO task.

305

306 For all P3 ERPs, amplitudes were extracted by measuring the largest positive deflection in  
307 the trial-average during the time-window ranging from 250-500ms following the time-locking  
308 event (measured at fronto-central electrodes FCz and Cz). For both N1 ERPs, amplitudes were  
309 extracted by measuring the largest negative deflection in the trial average during the time-  
310 window ranging from 100-300ms following the time-locking event (measured at occipital  
311 electrodes Oz, O1, and O2).

312

313 We ran the following correlation analyses using the Pearson correlation coefficient:

314

315 Main hypothesis: If the fronto-central P3 during surprise and after stop-signals signify the  
316 same process, there should be a positive correlation between the stop-signal P3 in the stop-signal  
317 task and both the visual and auditory unexpected-cue P3 in the cross-modal oddball task.

318 Control analysis 1: It is widely accepted that the occipital N1 is a visual perception process.

319 Hence, there should be a positive correlation between the posterior-occipital N1 to the go-signal  
320 arrow in the SST task and the N1 to the target-arrow stimuli in the CMO task. Both stimuli were

321 visually identical and had the same meaning in both tasks (they instructed a motor response in  
322 the according direction of the arrow). This control analysis was run to demonstrate that if two  
323 ERPs reflect the same process across tasks, their amplitudes will be correlated.

324 Control analysis 2: The correlation between the stop-signal P3 and the occipital N1 to the  
325 go-signal arrow I in the SST was examined to rule out the possibility that subjects show similar  
326 amplitudes for ERPs within the same task, even when they reflect different processes.

327 Control analysis 3: The correlation between the stop-signal P3 in the SST and the occipital  
328 N1 to the target-arrow in the CMO task was examined to rule out the possibility that subjects  
329 show similar amplitudes for different ERPs regardless of task and / or process.

330 Control analysis 4: The correlation between the stop-signal P3 in the SST and the fronto-  
331 central P3 to standard cues in the CMO task was examined to rule out the possibility that the  
332 stop-signal P3 is positively correlated with the fronto-central P3 to any meaningful task cue, even  
333 when that cue is not surprising.

334

335 Correlation comparison. We predicted that our main hypothesis, as well as our control  
336 analysis 1, would yield significant positive correlations. We also predicted that our other control  
337 analyses (2-4) would not yield significant correlations. Hence, the latter control analyses involve  
338 null hypothesis tests, with unknown statistical power.

339 Therefore, in addition to performing these control analyses, we directly compared the  
340 magnitude of all control correlations against the magnitude of the correlations between the stop-  
341 signal P3 and the fronto-central P3s to unexpected cues in the CMO task. This tested the  
342 alternative hypotheses that the predicted positive correlation would be significantly larger than

343 the nuisance correlations, thereby providing a direct test of our hypotheses. To do so, we used a  
344 bootstrapping approach. First, we inverted the N1 amplitudes so that correlations between any  
345 of the six amplitude measures (the four P3s and the two N1s) could be interpreted with the same  
346 directionality. There were two correlations that were expected to be significant (the stop-signal  
347 P3 versus the CMO P3 and the stop-signal N1 versus the CMO N1) and each of these were  
348 compared with the three correlations that were expected to be null (control analyses 2-4 above),  
349 resulting in six correlation differences. To test whether these differences were significant, we  
350 repeated the same analysis 5000 times, but instead of assigning each data point to the  
351 appropriate subject within each type of measure, the measures were randomly assigned to  
352 subjects before the correlations were calculated. This generated an empirical null hypothesis  
353 distribution of possible differences for each of the six pairs of correlations. A p-value for each  
354 correlation difference was then generated by calculating the proportion of these empirical null  
355 distribution values that were as large (or larger) than the difference that was found with the  
356 actual (unscrambled) data. Each of these 6 correlation differences were deemed reliable if this  
357 proportion was less than .05 (one-sided).

358

359 Partial correlations. Finally, an alternative to comparing correlations is to perform a  
360 multiple regression analysis that includes the nuisance variables within the same model.  
361 Therefore, we also fit linear models whose predictors included both the stop-signal P3 *and* each  
362 one of the nuisance ERP amplitudes as predictors, with fronto-central P3 to unexpected cues in  
363 the CMO task serving as the criterion variable. This produced a partial regression coefficient for

364 the hypothesized correlations between the stop-signal and surprise-related P3 amplitudes, with  
365 the influence of the nuisance process (reflected in the control ERP amplitude) factored out.

366

367 *2.9.2.2. Independent Component Analysis (Approach 2).*

368 Our second, complementary approach to test whether the stop-signal P3 and the fronto-  
369 central P3 to unexpected cues reflect overlapping neural processes used ICA.

370 Overview. In all of the analyses above (for both Approach 1 to Hypothesis 2 and for the  
371 analyses conducted to test Hypothesis 1), the SST and CMO task data were analyzed separately  
372 to avoid any potential bias towards finding a relationship between them. In contrast, for this  
373 analysis, the stop-signal and cross-modal oddball data were subjected to the *same* ICA. This  
374 allowed us to reanalyze the surprise analyses under Hypothesis 1 with re-constructed data that  
375 factored out the signal associated with the stop-signal P3. In this manner, we tested whether the  
376 association between the surprise term and fronto-central EEG activity in the cross-modal oddball  
377 task relies on the stop-signal IC (suggesting a commonality between processes, 19, 20, 29, 30), or  
378 whether processes captured by other ICs explain the surprise-related response in the CMO task  
379 (which would suggest that surprise-processing and action-stopping do not involve overlapping  
380 processes).

381 First, we used the SST portion of the data as a functional localizer, extracting one (and  
382 only one) independent component (IC) for each subject that best reflected the properties of the  
383 fronto-central stop-signal P3. We then generated two different datasets for the CMO task for  
384 each subject: one dataset in which the EEG channel data were reconstructed using only the one  
385 IC that reflected the stop-signal P3, and one dataset in which the channel data were

386 reconstructed by back-projecting all ICs *except* the stop-signal P3 IC (thereby effectively removing  
387 this IC's contribution from the channel data, similar to ICA-based eye-movement artifact  
388 rejection). We then re-ran the single-trial modeling analyses performed under Hypothesis 1,  
389 exactly as described above, separately on both datasets.

390 Stop-signal P3 IC selection. Automated selection of the stop-signal IC from the SST portion  
391 of the merged data was done using a two-step spatiotemporal selection procedure (31). First,  
392 each subject's component matrix was scanned for components that showed a fronto-centrally  
393 distributed positivity on stop- compared to go-trials in the time window 250ms following the  
394 respective signal. To this end, the scalp montage was divided into 9 ROIs (an anterior-posterior  
395 dimension and a lateral dimension with 3 levels each). Components whose back-projected  
396 channel-space topography for that difference wave showed a maximum in the fronto-central ROI  
397 (consisting of electrodes FCz, Cz, FC1, FC2, C1, and C2) were selected. From all components that  
398 matched this criterion, we then selected the one component whose average time-course across  
399 that ROI showed the highest correlation to the original channel-space ERP in the same ROI and  
400 time window (i.e., the ERP extracted from a back-projection of all non-artifact components).

401 Stop-signal P3 validation. We reconstructed the channel-space data for both tasks using  
402 only the selected component, and tested for the following effects on the SST portion of that  
403 dataset to validate that we had successfully selected the stop-signal P3 IC. These tests are direct  
404 replications of prior work that established the stop-signal P3 as an index of motor inhibition in  
405 the SST (17, 18):

406 1) The onset of the stop-signal P3 should occur earlier on successful vs. failed stop-trials  
407 (as predicted by the race-model of motor inhibition; Logan et al., 1984)

408           2) The onset of the stop-signal P3 should be positively correlated with SSRT, reflecting its  
409 association with the speed of the stopping process.

410           For these tests, the onset of the stop-signal P3 was quantified as in Wessel & Aron (2015)  
411 based on the difference wave between stop- and go-trials (this was done independently for  
412 successful and failed stop trials). The time at which the P3 difference wave was largest in the time  
413 period 200-400ms following the stop-signal was identified. The analysis worked backwards in  
414 time from this maximum difference, with each step backwards occurring only if that step was  
415 also significantly greater than 0 (at  $p < .05$ ). Once a non-significant difference was reached, this  
416 determined the time of the P3 onset. The onset times of the successful and failed stop-trials were  
417 then compared using a paired-samples t-test (prediction #1 above). Next, the relationship  
418 between the successful stop onset and the SSRT across participants was assessed with Pearson's  
419 correlation coefficient (prediction #2 above).

420           Main analysis. We then repeated the model-based single-trial analysis of the CMO task  
421 data that was described above for Hypothesis 1, but only on the portion of the EEG data that was  
422 explained by the stop-signal P3. In essence, instead of looking at the entire EEG signal, we  
423 reconstructed the channel-space signal of the merged EEG data from both tasks by only back-  
424 projecting the activity accounted for by the stop-signal P3 IC. We then investigated the task  
425 portion of the merged, component-restricted dataset using the same model-fitting procedure as  
426 for Hypothesis 1 above. Only the winning model from Hypothesis 1 was fit to the data. If the stop-  
427 signal P3 and the surprise-related P3 reflect overlapping neural processes, the model fit should  
428 be preserved in that dataset.

429            Additionally, we also reconstructed a version of the merged dataset that consisted of the  
430 back-projection of all original ICs *with the exception of the stop-signal P3 component* (essentially,  
431 the inverse of the above dataset). Since participants averaged 17.1 (SEM: .87) components, these  
432 data were reconstructed based on the activity of 16.1 independent components. Just as for the  
433 single-component dataset that included just the stop-signal P3, we again fit the Bayesian model.

434            As in Hypothesis 1, this resulted in 640 tests per set (640 for the single-IC dataset and 640  
435 for the other-ICs dataset). As before, the p-values for these tests were corrected across both sets  
436 of tests to an alpha-level of .01. This resulted in a corrected alpha-level of  $p = .00027$ .

437

### 438 **3. Results**

#### 439 *3.1. Behavior*

440            Stop-signal behavior was as expected for a sample of healthy young adults. Mean Go-RT  
441 was 520ms (SEM: 15.2), mean failed-stop RT was 444.3ms (SEM:13.2). Mean SSRT was 252.4ms  
442 (SEM: 8). Mean error and miss rates were low (1% and 2.6%, respectively). Mean stopping success  
443 was 51.4% (SEM: .45, range: 46-59%), demonstrating the effectiveness of the adaptive stop-  
444 signal delay algorithm.

445            In the cross-modal oddball task, correct trial RTs showed the expected pattern as well:  
446 There was a main effect of TRIAL TYPE ( $F(2/108) = 25.3$ ,  $p = 9.74 \times 10^{-10}$ ,  $\text{partial-}\eta^2 = .32$ ), a  
447 main effect of BLOCK ( $F(3/162) = 7.64$ ,  $p = 8.2567 \times 10^{-5}$ ,  $\text{p-}\eta^2 = .12$ ), and a significant  
448 INTERACTION ( $F(6/324) = 9.78$ ,  $p = 6.51 \times 10^{-10}$ ,  $\text{p-}\eta^2 = .15$ ). Individual comparisons revealed  
449 that in Block 1, both visual and auditory unexpected-cue RTs were significantly longer compared  
450 to standard-cue RTs ( $t(54) = 9.41$ ,  $p = 5.48 \times 10^{-13}$ ,  $d = .75$  for visual and  $t(54) = 3.14$ ,  $p = .0028$ ,  $d$



451 = .29 for auditory, respectively). Furthermore, in Blocks 2 and 4, visual unexpected-cue RTs were  
452 also longer compared to standard-cue RTs ( $t(54) = 4.45$ ,  $p = 4.3 \times 10^{-5}$ ,  $d = .33$  and  $3.5$ ,  $p = .00094$ ,  
453  $d = .26$ , respectively). No other comparisons survived corrections for multiple comparisons. Taken  
454 together, the data indicate the presence of an initial slowing of reaction times following  
455 unexpected cues in both modalities, which wore off over the course of the experiment (Figure 4).

456 With regards to error rates, there was a significant main effect of TRIAL TYPE ( $F(2/108) =$   
457  $3.89$ ,  $p = .023$ ,  $p\text{-}\eta^2 = .067$ ), with no main effect of BLOCK ( $F(3/162) = .4096$ ,  $p = .74631$ ,  $p\text{-}$   
458  $\eta^2 = .0075$ ), and no INTERACTION ( $F(6/324) = .7$ ,  $p = .65$ ,  $p\text{-}\eta^2 = .013$ ). The main effect was  
459 accounted for by lower error rates on both types of unexpected-cue trials compared to the  
460 standard-cue trials, which persisted throughout the task.

461 With regards to miss rates, there was no significant main effect or interaction (all  $p > .14$ ).  
462

## CROSS-MODAL ODDBALL TASK: REACTION TIMES

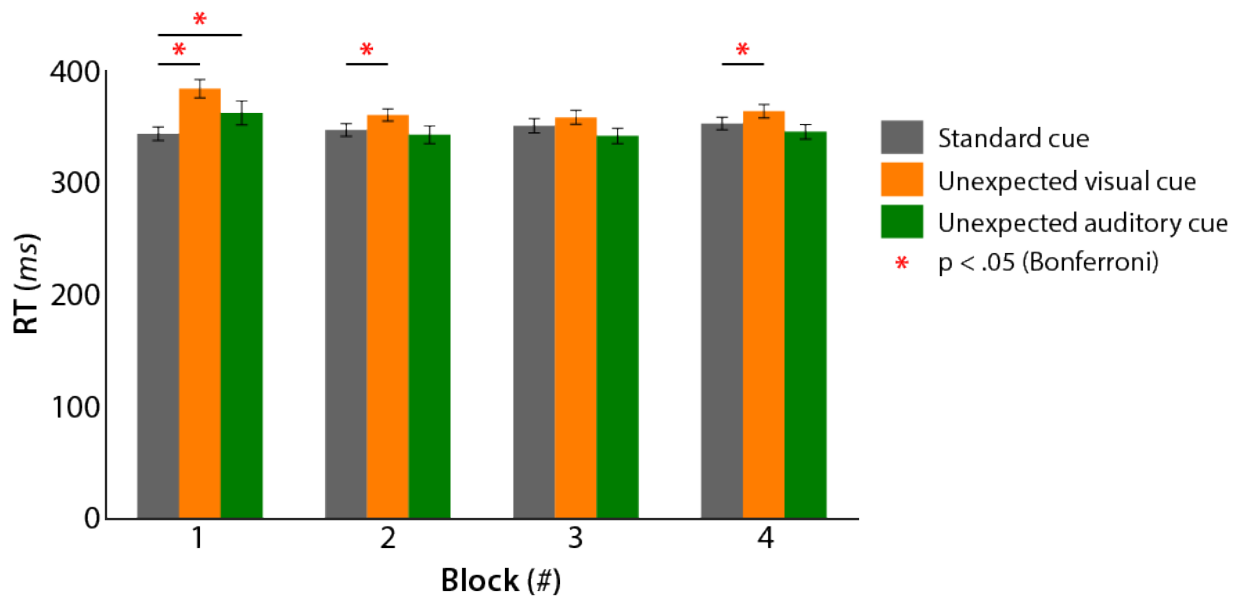

463

464 **Figure 4.** Reaction time data from the cross-modal oddball task. Significant individual  
465 comparisons (Bonferroni-corrected) are highlighted in red. For both unexpected auditory and  
466 unexpected visual cues, reaction times were slower compared to standard cues in Block 1. This  
467 effect wore off over time.

468

469 *3.2. Hypothesis 1: Frontal cortex independently tracks surprise depending on sensory domain*

470 3.2.1. Single-trial EEG model fitting

471 Our single-trial EEG analysis showed that both models significantly fit the data in the time  
472 windows centered on 300 and 350ms post-cue (Figure 5). Both model terms show significant  
473 positive correlations with fronto-central electrodes, as hypothesized. Positive correlations that  
474 exceeded the significance threshold of  $p = .00044$  for Model 1 (separate surprise terms) were  
475 found at electrodes Fz, Cz, FCz, FC1, FC2, F1, F2, C1, C2, FC3, and FC4 in the 300ms time window  
476 and at electrodes F3, F4, Fz, Cz, FCz, FC1, FC2, F1, F2, C1, C2, FC3, and FC4 in the 350ms time  
477 window. For Model 2 (common surprise term), significant positive correlations were found at  
478 electrodes Fz, FCz, FC1, FC2, F1, F2, C1, C2, and FC3 in the 300ms time window and at electrodes  
479 F4, Fz, Cz, FCz, FC1, FC2, F1, F2, FC3, and FC4 in the 350ms time window.

480 While both models fit the data well at a similar cluster of fronto-central electrodes (which  
481 is to be expected, considering that the surprise terms from each model are largely similar), direct  
482 model comparisons showed that Model 1 (separate terms) fit the data significantly better than  
483 Model 2 (common term). While Model 1 provided numerically better fits at all fronto-central  
484 electrodes, the difference was statistically significant at  $p < .00044$  in the 350ms time window at  
485 electrodes Cz, FC2, C1, and C2 (Figure 5C).

486

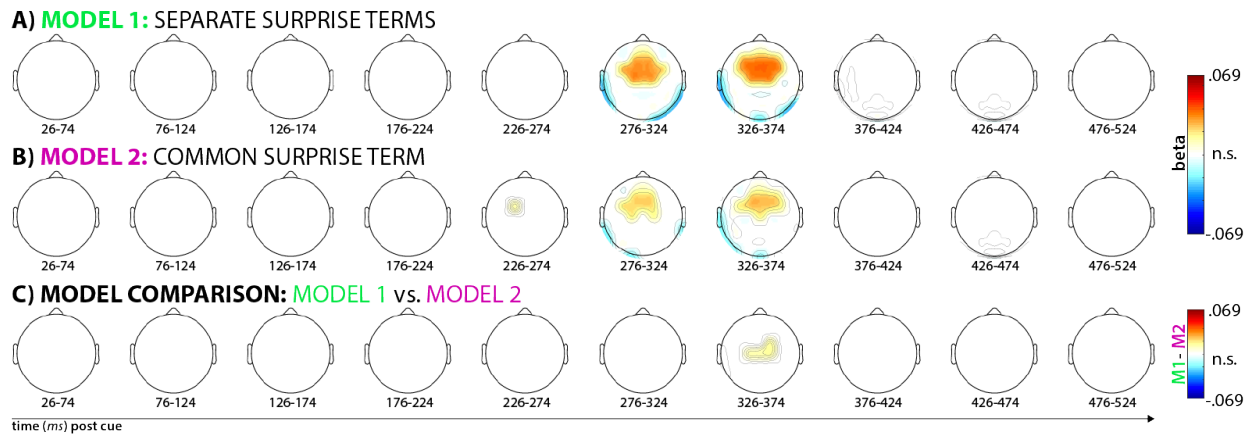

487

488 **Figure 5.** Results from the whole-brain single-trial model fitting analysis described in Figure 3.

489 Each topography depicts the averaged standardized beta coefficient at each channel in the

490 respective time window (x-axis) and model (plots A and B), as well as the M1-M2 model

491 comparison (plot C). White areas denote channels at which the fit within the depicted time-

492 window was non-significant ( $p < .00044$ ). In A and B, red areas denote significant positive

493 correlations between the respective model and the EEG data, blue areas denote significant

494 negative correlations. In C, red areas denote higher correlations between Model 1 and the data

495 compared to Model 2.

496

497 For illustrative purposes, Figure 6 depicts the trial-averaged time-course of the ERP for all

498 three cue types in a non-windowed fashion at these fronto-central electrodes. As seen in the

499 figure, the time window in which the surprise-model significantly fit the single-trial data

500 (highlighted in beige), both unexpected cues yield a P3 waveform, with the auditory condition

501 producing a noticeably larger deflection.

## EVENT-RELATED POTENTIAL: TRIAL AVERAGE

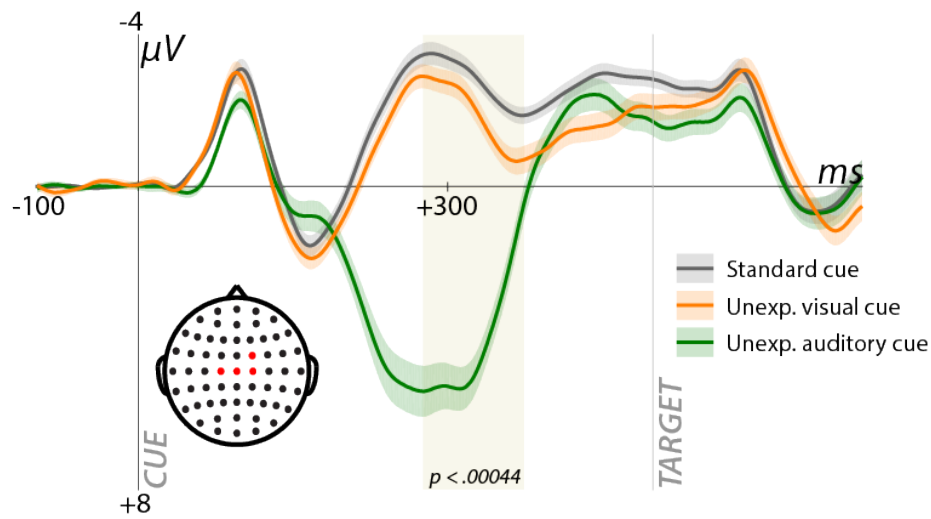

502

503 **Figure 6.** Average channel event-related response to the three different cue types, plotted at the  
504 channels in which the winning model (separate surprise terms; Model 1) provided significantly  
505 better fit than the losing model (common surprise term). Beige highlighting denotes the time  
506 window in which the winning model significantly fit the single-trial EEG response. This trial  
507 average illustrates that the time window in which the fit was significant contains the fronto-  
508 central P3 ERP to both unexpected auditory and visual cues.

509

510 To illustrate that neither sensory domain accounted for the significant model fit on its  
511 own, we also plotted the model fits separately for each trial type (rather than using one variable  
512 to model both trials types as in the main analysis above). Figure 7 shows the model fits for the  
513 separate surprise term (the winning model from the main analysis), split by sensory domain. This  
514 revealed that both auditory and visual surprise terms significantly fit the single-trial EEG response  
515 to their respective trial type during the same time period and at the same fronto-central scalp

516 sites as the overall fit. This also rules out that the auditory P3, which had a larger amplitude than  
517 the visual P3, would solely account for the model fits.

518

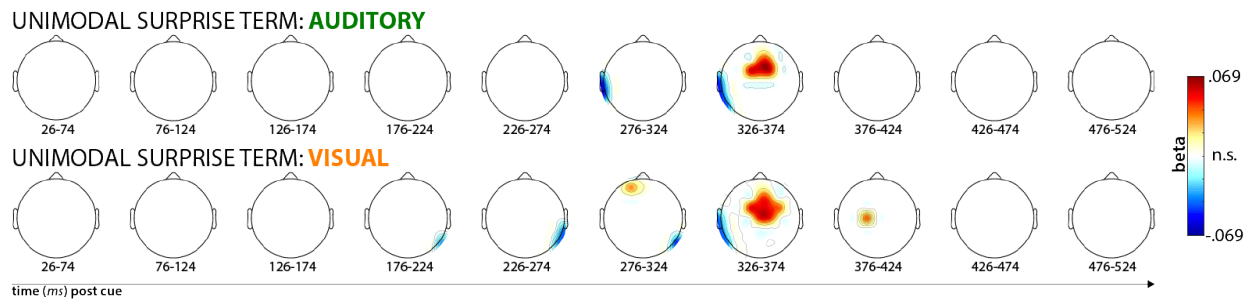

519

520 **Figure 7.** Split model fits of the within-domain surprise values, individually for each sensory  
521 domain. Scaling and significance threshold is the same as in Figure 5 ( $p < .00044$ ). This plot shows  
522 that both the auditory and visual unexpected cues contribute to the significant single-trial fit of  
523 the separate surprise-terms model in Figure 5A.

524

### 525 3.2.2. Exploratory model-fitting of reaction time latencies

526 We buttressed our EEG analysis of Hypothesis 1 with an exploratory analysis of the fit  
527 between both model terms and each participant's single-trial reaction times to the target-arrow  
528 that followed the cue. Both model terms provided a positive fit with the RT data (i.e., slower RT  
529 with surprise), with Model 1 showing a better fit overall, but neither fit was significant at the  
530 group level (Model 1:  $p = .23$ , Model 2:  $p = .84$ ). When this analysis was restricted to the first half  
531 of the experiment (i.e., the part of the experiment in which the RT effect of the unexpected  
532 events had not fully worn off, cf. behavioral results section), both models showed again positive  
533 fits between the model terms and RT. For Model 1, the fit was highly significant ( $t(54) = 3.98$ ,  $p$   
534  $= .00021$ ), whereas the fit for Model 2 only bordered significance ( $t(54) = 1.88$ ,  $p = .066$ ). Just like

535 for the single-trial EEG data, Model 1 (separate terms) fit RT better than Model 2 (combined term);  
536  $t(54) = 3.71$ ,  $p = .00049$ . While this analysis has to be interpreted with caution, given its  
537 exploratory nature, it does lend complementary support to the idea that – just like the neural  
538 response – the effect of the unexpected cues on behavior is better described by Model 1.

539

### 540 *3.3. Hypothesis 2: Fronto-central neural activity after surprise indexes inhibitory control*

#### 541 3.3.1. Approach 1: Cross-task ERP amplitude correlations

542 Figure 8 depicts the correlations between the ERPs across both tasks. In line with our  
543 hypothesis that action-stopping and surprise-processing share a fronto-central neural process,  
544 there was a significantly positive correlation between the amplitudes of the fronto-central stop-  
545 signal P3 in the SST and the fronto-central P3 ERP to unexpected auditory ( $r = 0.35$ ,  $p = .0079$ )  
546 and visual ( $r = 0.35$ ,  $p = .0087$ ) cues in the CMO.

547 The control analyses also conformed to our predictions: The posterior visual N1 ERPs to  
548 the arrow go-signal in the SST correlated with the visual N1 ERPs to the arrow target in the CMO  
549 ( $r = .55$ ,  $p = .00001$ ), demonstrating that the same process as occurring in each task can produce  
550 a positive ERP correlation. Moreover, there was no significant correlation in any of the control  
551 analyses designed to rule out various alternative explanations of the positive correlation between  
552 the SST P3 and the CMO P3 (Control analyses 2-4). Specifically, the amplitude of stop-signal P3  
553 was not reliably correlated with the amplitude of the N1 to the Go-signal within the same task ( $r$   
554  $= -.11$ ,  $p = .41$ ), demonstrating that individual differences failed to produce a spurious ERP  
555 correlation within a task. Similarly, the stop-signal P3 amplitude was not reliably correlated with  
556 the visual N1 to the arrow (target) within the cross-modal oddball task ( $r = .009$ ,  $p = .95$ ),

557 demonstrating that individual differences failed to produce a spurious ERP correlation across  
558 tasks. Finally, stop-signal P3 amplitude was not reliably correlated with the fronto-central P3  
559 amplitude to standard, non-surprising cues in the CMO task ( $r = .073$ ,  $p = .6$ ), demonstrating that  
560 individual differences failed to produce a spurious ERP correlation for the same ERP component.

561 In addition to these significance tests on the correlations, our bootstrapping analysis  
562 found that the positive correlations between the stop-signal P3 and the fronto-central P3s to  
563 unexpected cues in the CMO task were significantly larger than all of the non-significant control  
564 analyses. More specifically, the correlation between the stop-signal P3 and the fronto-central P3  
565 to auditory cues was significantly larger than the stop-signal P3 to target-N1 correlation ( $p$   
566  $= .0136$ ), the stop-signal P3 to go-signal N1 correlation ( $p = .0482$ ), and the stop-signal P3 to  
567 standard-cue P3 correlation ( $p = .0348$ ). The corresponding  $p$ -values for the correlation between  
568 the stop-signal P3 and the fronto-central P3 to unexpected visual cues, as compared to the three  
569 control correlations were  $.0144$ ,  $.0468$ , and  $.0373$ .

570 Finally, the partial correlation analyses confirmed that the positive correlation between  
571 the stop-signal P3 and the fronto-central P3 to unexpected cues in the CMO task could not be  
572 accounted for by the amplitude of any of the control ERPs. For unexpected visual cues, the  
573 correlation between the fronto-central P3 and the stop-signal P3 was still significant when the  
574 model partialled out the Go-signal N1 (partial model fit:  $t(52) = 2.69$ ,  $p = .0095$ ), the N1 to the  
575 target/arrow in the CMO task ( $t(52) = 2.7$ ,  $p = .0094$ ), and the fronto-central P3 to standard cues  
576 in the CMO task ( $t(52) = 3.47$ ,  $p = .001$ ). The same was true for the correlations between the stop-  
577 signal P3 and the fronto-central P3 to unexpected auditory cues (Go-signal N1 partialled out:  $t(52)$

578 = 2.69,  $p = .0097$ ; N1 to the arrow/target in the CMO task partialled out:  $t(52) = 2.83$ ,  $p = .0067$ ;  
 579 fronto-central P3 to standard cues partialled out:  $t(52) = 2.7$ ,  $p = .0094$ ).

580

## A) FRONTO-CENTRAL ACTIVITY: CROSS-TASK CORRELATIONS

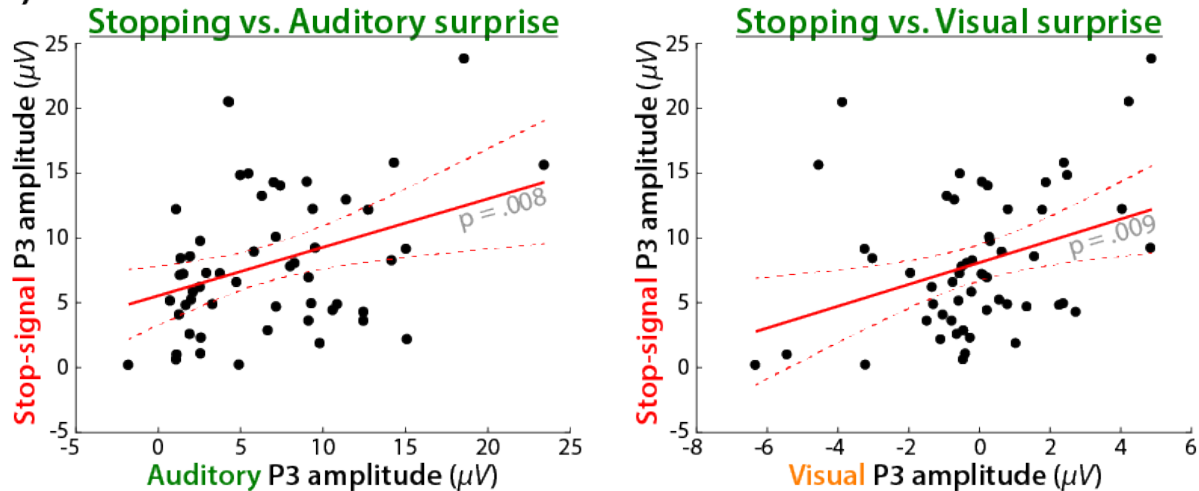

## B) CONTROL ANALYSES

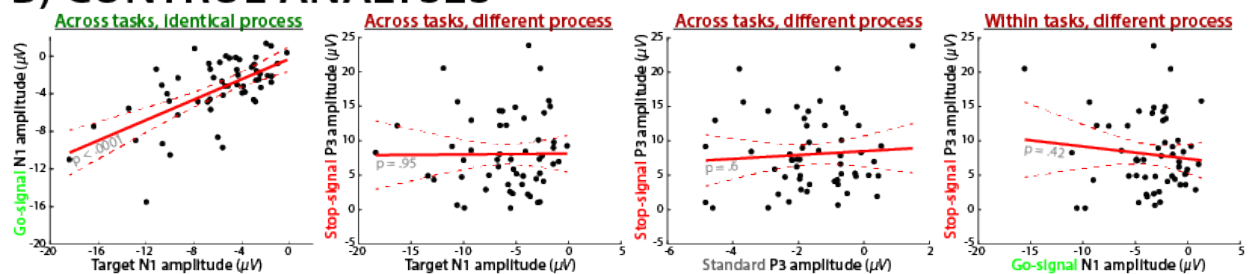

581

582 **Figure 8.** Cross-task correlations between fronto-central activity during surprise processing and

583 action-stopping. A) The amplitude of the stop-signal P3 in the SST was positively correlated with

584 the surprise-related P3 in the CMO task; this was the case for both for auditory (left) and visual

585 (right) unexpected cues. B) Control analyses show that ERP amplitudes of similar processes are

586 indeed positively correlated across tasks (illustrated by the posterior visual N1 to the imperative

587 arrow stimuli in both tasks – i.e., the Go-signal in the SST and the target in the CMO task). Ruling

588 out alternative explanations, there was no reliable correlation for different waveforms from

589 different tasks (middle left; Target visual N1 to stop-signal P3), different waveforms from the



590 *same task (right; go-signal visual N1 to stop-signal P3), or the same waveform from different*  
591 *tasks (middle right; standard cue P3 to stop-signal P3). These control analyses demonstrate that*  
592 *there is no general relationship between ERP amplitudes within or across the same task or within*  
593 *the same region of cortex, unless related processes are active.*

594

### 595 3.3.2. Approach 2: ICA

596       The results from Approach 1 to Hypothesis 2 suggest that action-stopping and surprise-  
597 processing involve overlapping neural processes. Providing converging support for this  
598 conclusion, we used ICA to investigate whether the trial-by-trial relationship between the  
599 Bayesian model surprise terms and the fronto-central activity found in the CMO task was  
600 accounted for by the independent component that reflected the stop-signal P3.

601       We first checked whether the IC that was algorithmically selected to reflect the stop-  
602 signal P3 showed the predicted functional properties in the SST (Figure 9). Indeed, the onset of  
603 the P3 extracted from that IC occurred significantly earlier on successful stop-trials compared to  
604 failed stop-trials ( $t(54) = 2.4$ ,  $p = .02$ ,  $d = .33$ ), and there was a significantly positive correlation  
605 between SSRT and P3 onset on successful stop-trials ( $r = 0.32$ ,  $p = .019$ ). Both properties have  
606 been previously reported in studies of the SST (e.g., Wessel & Aron, 2015). Hence, we conclude  
607 that the selected IC accurately reflected a process that indexes the speed of the motor inhibition  
608 process in the SST.

609

### STOP-SIGNAL TASK: SELECTED FRONTO-CENTRAL COMPONENT PROPERTIES

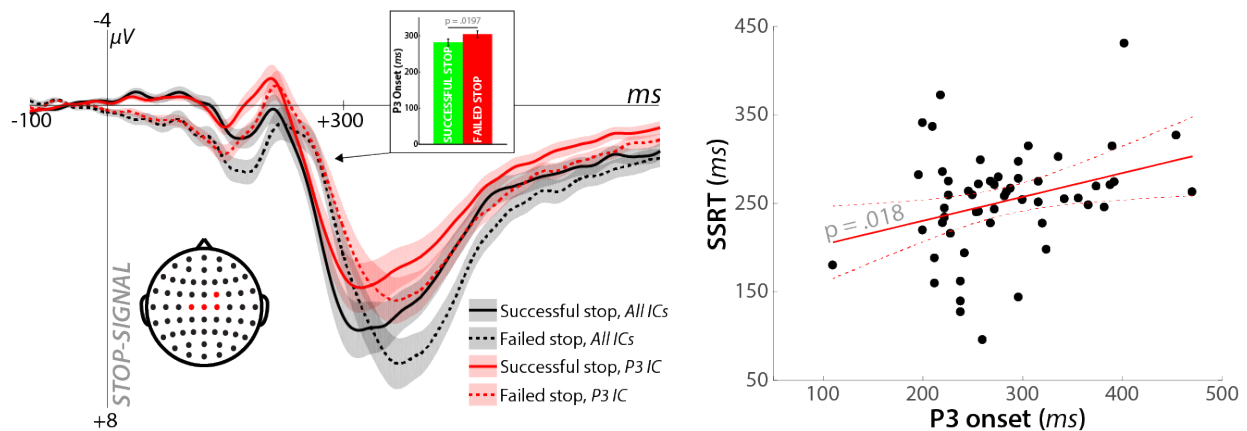

610

611 **Figure 9.** Properties of the independent component selected to reflect the stop-signal P3 in the  
612 SST from the merged dataset analysis. The left plot shows that the morphology of the stop-signal  
613 P3 based on all non-artifact components (i.e., the standard channel ERP) can be entirely  
614 reproduced using just one IC. This shows that the selection algorithm identified the appropriate  
615 component, accounting for the activity of the stop-signal P3. Furthermore, this IC shows the  
616 classic features demonstrated for the stop-signal P3 in the SST. Namely, the onset of the P3 was  
617 earlier on successful vs. failed stop trials (inlay on left plot), and was positively correlated with  
618 SSRT across subjects (right plot).

619

620 We then repeated our model-fitting analysis (Hypothesis 1) of the CMO task portion of  
621 the combined EEG data, when that data was reconstructed using only the selected stop-signal P3  
622 IC for each subject. We found that the winning model from Hypothesis 1 (separate surprise terms)  
623 retained its significantly positive fit with fronto-central electrodes (significant positive  
624 correlations found in the 300ms time window at electrodes Fz, Cz, FCz, FC1, FC2, CP2, F1, F2, C1,  
625 C2, FC4, and C4 and in the 350ms time window at electrodes C4 and F1) when the EEG signal was  
626 solely reproduced by back-projecting the stop-signal P3 into channel-space. In other words, the

627 same independent component that indexes successful motor inhibition in the stop-signal task  
628 showed the same positive association with the surprise term in the CMO task that was reported  
629 for the full channel-space reconstruction (based on all ICs) in Hypothesis 1 (Figure 10A).

630 In contrast, the remainder of the signal (i.e., the portion of the CMO task EEG data that  
631 was reconstructed based on all independent components that were left over after the stop-signal  
632 P3 independent component was *removed*) did not show a significant positive association with  
633 the surprise term (Figure 10B).

634 Therefore, we conclude that the same independent component captures stopping-  
635 related activity in the SST and surprise-related activity in the CMO task. This confirms the findings  
636 of our ERP amplitude analysis in Approach 1 – i.e., that there is overlap between the neural  
637 processes following stop-signals (which are not surprising) and surprising cues (which do not  
638 instruct the subject to stop).

639

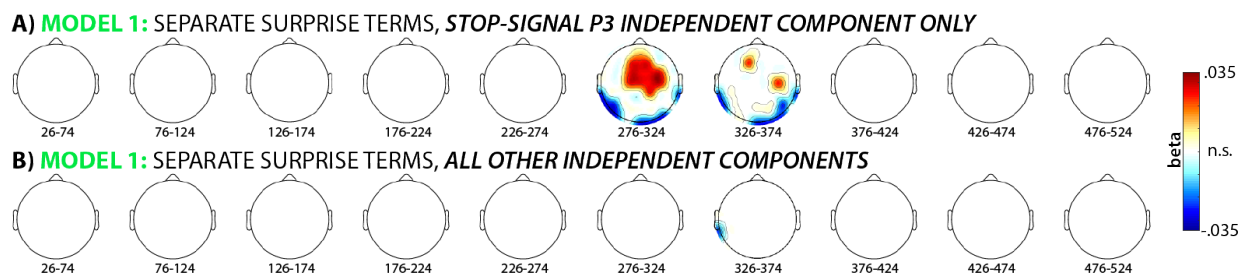

641 **Figure 10.** A) A reanalysis of the single-trial model fitting analysis for the winning model (separate  
642 surprise terms cf. Figure 5A) using just the one IC that was selected to reflect the stop-signal P3  
643 in the merged dataset. The significant association between fronto-central EEG activity following  
644 unexpected cues in the CMO task and the surprise model is retained when the data is  
645 reconstructed solely using that one ICA (out of ~17.1 overall ICs that were extracted per subject

646 *on average). B) For comparison, no significant association was found when the data were*  
647 *reconstructed based on the ~16.1 ICs that did not reflect the stop-signal P3.*

648

#### 649 **4. Discussion**

650 In the current study, we tested two hypotheses about the nature of surprise processing  
651 in human frontal cortex. First, we found that fronto-central event-related activity at roughly 275-  
652 375ms following the appearance of unexpected cues tracks surprise for each sensory domain  
653 separately. Rather than incorporating surprise into a common cross-modal term, the neural  
654 response was better characterized by a model in which surprise was tracked for each domain  
655 separately. The time range and topographical extent of this activity overlaps with the well-  
656 characterized P3 trial-average ERP, which is in line with classic averaging-based ERP studies of  
657 surprise (1, 12, 32). Our single-trial approach was able to disentangle two competing explanations  
658 for the common activity found for unexpected events across sensory domains, thereby providing  
659 novel insights into how frontal cortex constructs and updates models of the multi-sensory  
660 environment.

661 We then tested whether the modality-independent fronto-central neural activity during  
662 surprise indexes a rapid inhibition of ongoing motor activity – i.e., whether the convergence  
663 between neural signals following unexpected events, regardless of sensory domain, can be  
664 explained by a common control mechanism that is downstream from surprise. This hypothesis is  
665 relatively new (15, 33-35), as most previous studies of surprise focused on its cognitive effects  
666 (12, 14, 36, 37). The comparatively large sample size of our study allowed us to take the novel  
667 approach of correlating electrophysiological signal amplitudes across different tasks, revealing

668 that the P3 amplitude following stop-signals in the stop-signal task reliably correlated with the  
669 fronto-central P3 found during multi-modal surprise. Our control analyses indicated that this  
670 correlation reflects a common process rather nuisance variables (such as non-specific  
671 correlations of ERP amplitudes within or across tasks). Moreover, both ERPs reflected the same  
672 component when submitted to a joint independent components analysis.

673 We conclude that the same process that is underlying the stop-signal P3 is also active  
674 during cross-modal surprise. However, what is that process? The most parsimonious explanation  
675 is that this signal reflects cognitive control within frontal cortex aimed at inhibiting ongoing motor  
676 activity. In the case of stop-signals, this stops the planned motor action, whereas in response to  
677 surprise, it produces a 'pause', which purchases time for the cognitive system to update the  
678 model of the environment without continuing an action that may have been rendered  
679 inappropriate by the unexpected change in environmental demand. This pause can also be  
680 observed in the reaction time times to the subsequent target. Alternatively, the common process  
681 might reflect model updating or surprise (as operationalized in the CMO). However, in the SST,  
682 stop-signals are explicitly part of the task (and are introduced during pre-task practice). In other  
683 words, participants are *expecting* and planning for stop-signals, and their occurrence should not  
684 produce surprise. Indeed, if stop-signals were surprising, one would expect the amplitude of the  
685 stop-signal P3 to decrease as the task progressed (i.e., as the priors become stable and the  
686 surprise terms become smaller and smaller, which is what occurred for the fronto-central P3 in  
687 the CMO task). However, as the auxiliary plot in Figure 11 shows, the amplitude of the stop-signal  
688 P3, unlike the P3 to unexpected cues in the CMO task, remained constant throughout the

689 experiment. This is incommensurate with explanations that seek to attribute the cross-task  
690 commonalities in neural processing to surprise, infrequency, orienting, or model updating.

### STOP-SIGNAL TASK: FIRST VS. SECOND HALF

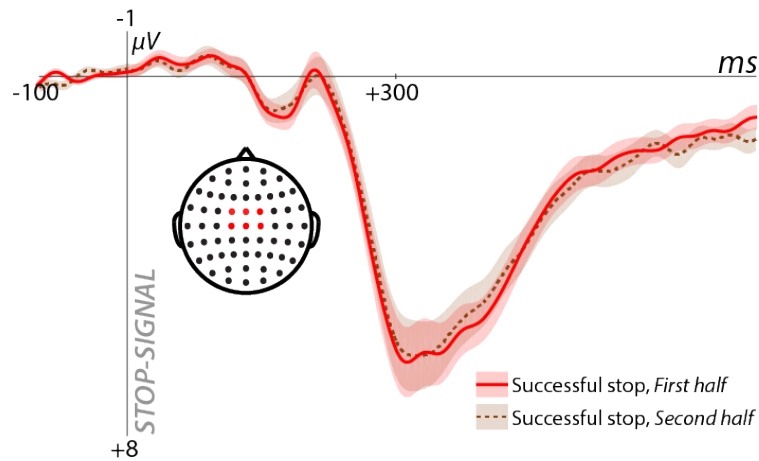

692 **Figure 11.** Stop-signal P3 split by phase of the SST experiment. If the process underlying the stop-  
693 signal P3 was stop-signal-induced surprise, its amplitude should decrease in the second half of the  
694 experiment. Instead, the stop-signal P3 is nearly identical across the two halves of the experiment.

695  
696 Our preferred interpretation of the common process in terms of motor control is  
697 supported by recent studies, which found that unexpected perceptual events lead to a broad,  
698 reactive suppression of the motor system, as measured using transcranial magnetic stimulation  
699 (35, 38). Additionally, measurements of isometrically exerted force have shown that unexpected  
700 events lead to a rapid, reactive reduction of such steadily exerted motor activity (34).  
701 Furthermore, unexpected events have been found to interrupt ongoing finger-tapping (39).  
702 Finally, studies using optogenetics have shown that when regions of the subcortical network that  
703 cause inhibition of motor activity are experimentally inactivated, unexpected events no longer

704 yield interruptive effects on motor behavior (40). All these studies show that surprise, in addition  
705 to its prominent cognitive effects, also lead to interruption of ongoing motor activity.

706         The interpretation that the common process between the stop-signal and CMO tasks is  
707 motor control is also supported by some features of our data. Specifically, our behavioral data  
708 indicated an incidental slowing of reaction times to the target in the CMO task when that target  
709 was preceded by unexpected cues, which is in line with prior behavioral studies (41-43). Our  
710 exploratory analysis showed that during the task period in which this RT effect was present, the  
711 surprise model (specifically, the separate-term model that also provided the best fit to the neural  
712 data) was positively related to the RT data: trials with more surprising cues, according to the  
713 Bayesian model, yielded longer reaction times to the subsequent target. We propose that this  
714 extra time reflects a momentary suppression of the motor system produced by the unexpected  
715 event. Supporting this claim that this ‘pause’ is an adaptive process, accuracy was also increased  
716 following unexpected cues (i.e., a speed-accuracy tradeoff was enacted after unexpected cues,  
717 which may be enabled by the transient pause in the motor system that we purport to be reflected  
718 in the fronto-central P3). In that vein, one notable observation is that while the surprise term fit  
719 the neural data for both domains to similar degrees (Figure 7), the trial-average response to  
720 unexpected auditory cues in our current study appeared to be larger in amplitude compared to  
721 unexpected visual cues (Figure 6). Interestingly, the reverse was the case in the reaction time  
722 pattern, where visual unexpected cues seemed to have larger effects (Figure 4). While we are  
723 hesitant to make strong conclusions based on the trial-average data, it is notable that the timing  
724 of the P3 to the different stimuli also differs in latency, which likely reflects the fact that early  
725 auditory processing is faster than visual processing (44). Since the increase in trial-averaged P3

726 response to unexpected visual cues extends to a time period much closer to target presentation  
727 (compared to the P3 to auditory unexpected cues, cf. Figure 6), it is tempting to assume that this  
728 may explain the difference in RT effects. However, further studies are necessary to explicitly test  
729 this hypothesis.

730         There is some debate in the literature about the interpretation of the surprise term used  
731 in our model comparison analysis. We followed the nomenclature of Itti and Baldi (2010), who  
732 termed the calculation of the Kullback-Leibler divergence of the posterior and prior probability  
733 distributions (Equation 1) ‘Bayesian surprise’. However, other authors have interpreted this term  
734 as ‘model updating’, rather than surprise (45). Instead of KL divergence, they favor Shannon-  
735 based information theoretical quantifications of surprise (i.e., surprise is quantified as the inverse  
736 of the log-scaled prior expectation of a given stimulus, 46). In past EEG studies, such Shannon-  
737 based surprise has been related to the amplitude centro-parietal P3 ERP (47, 48), rather than the  
738 fronto-central P3. This is in line with BOLD activation of parietal cortex, which tracks such  
739 Shannon-surprise in fMRI (45). Conversely, trial-by-trial indices of Bayesian surprise are  
740 associated with the fronto-central P3 (48), which is in line with the current study, as well as with  
741 fMRI work showing that BOLD activity in medial frontal cortex tracks Bayesian surprise (45).  
742 Collectively, these results underscore that Shannon-surprise and Bayesian surprise are not only  
743 different computational terms but that they may be related to different neural signals.

744         However, in terms of the theoretical distinction between Bayesian surprise and Shannon  
745 surprise, it is important to note that both concepts are closely related in most circumstances –  
746 i.e., whenever there is surprise, it will lead to the updating of internal models of the environment.  
747 This is also reflected in a high correlation between Shannon- and Bayesian surprise that is present



748 in most experimental circumstances (including the current one). Under some circumstances, it is  
749 possible to untangle surprise and model updating by introducing different degrees of volatility  
750 into the environment (49) or by explicitly instructing participants that certain surprising cues  
751 should not be used to update the internal model of the task (45). However, in studies like the  
752 current one, the two terms are largely identical, with the exception being trials in which in an  
753 unexpected cue follows a prolonged sequence of expected cues. (Such trials introduce non-  
754 monotonous upticks in the Shannon surprise term, whereas the Bayesian surprise / model  
755 updating term is always monotonically decreasing). Perhaps most relevant is the question which  
756 term better reflects the commonplace meaning of ‘surprise’ in the everyday world, outside of  
757 the laboratory, and which term better reflects the participants’ approach to the experiment. If  
758 subjects place strong emphasis on the recent trial sequence and dynamically adapt to the  
759 changing local probabilities of unexpected cues, then the Shannon term may provide a better  
760 characterization of surprise. This would be the case if participants assume that the current  
761 environment constantly changes (i.e., high volatility). However, if subjects approach the  
762 experimental task as a specific, unchanging environment that they need to adapt to by learning  
763 the base rates of occurrence, then the Bayesian surprise term may provide a better  
764 characterization of surprise. In the current study we assumed that the latter is the case (indeed,  
765 the experimental design involved a stable procedure for each task), and as such, ‘surprise’ and  
766 ‘model updating’ are essentially synonymous in our study.

767       Taken together, our study suggests that when an environmental model is updated  
768 because of an unexpected cue, this leads to surprise, which is accompanied by inhibitory control  
769 of the motor system. From a real-world perspective, it makes sense for the cognitive apparatus

770 to operate this way. Because we interact with the environment by executing motor commands,  
771 it is important that we interrupt ongoing motor behavior while the model of the environment is  
772 updated; ongoing actions need to be re-evaluated in light of changing environmental  
773 contingencies. We hypothesize that motor inhibition prevents the execution of actions that were  
774 appropriate under the old, now outdated model, and may also free up resources to rapidly  
775 initiate appropriate new actions. This interpretation of the medial frontal cortex is in line with  
776 prior findings regarding its role in the control of behavior (2, 50, 51). Here, we propose a specific  
777 neural mechanism by which such control of behavior is achieved during surprise.

778 In conclusion, we found that surprise-based model updating in frontal cortex occurs  
779 separately for each sensory domain, but shares a supra-model control mechanism that likely  
780 involves the inhibitory control of behavior. These results suggest a specific control mechanism  
781 that is rapidly deployed when the model of the environment unexpectedly changes.

782

783 **Acknowledgements**

784 The authors thank the following individuals for help with data collection: Hailey Billings, Nathan  
785 Chalkley, Kylie Dolan, Isabella Dutra, Tobin Dykstra, Jenna Kelly, Cailey Parker, Julian Scheffer,  
786 and Darcy Waller. This research was funded by the following grants: NIH R01 NS102201 and NSF  
787 CAREER 1752355 to JRW; NIH RF1 MH114277 to DEH.

788

## 789 **References**

- 790 1. Donchin E. Surprise!... surprise? *Psychophysiology*. 1981;18(5):493-513.
- 791 2. Alexander WH, Brown JW. Computational models of performance monitoring and  
792 cognitive control. *Top Cogn Sci*. 2010;2(4):658-77.
- 793 3. Corbetta M, Shulman GL. Control of goal-directed and stimulus-driven attention in the  
794 brain. *Nat Rev Neurosci*. 2002;3(3):201-15.
- 795 4. Friston K. The free-energy principle: a unified brain theory? *Nat Rev Neurosci*.  
796 2010;11(2):127-38.
- 797 5. Baldi P, Itti L. Of bits and wows: A Bayesian theory of surprise with applications to  
798 attention. *Neural Netw*. 2010;23(5):649-66.
- 799 6. Hayden BY, Heilbronner SR, Pearson JM, Platt ML. Surprise signals in anterior cingulate  
800 cortex: neuronal encoding of unsigned reward prediction errors driving adjustment in behavior.  
801 *The Journal of neuroscience : the official journal of the Society for Neuroscience*.  
802 2011;31(11):4178-87.
- 803 7. Wessel JR, Danielmeier C, Morton JB, Ullsperger M. Surprise and error: common neuronal  
804 architecture for the processing of errors and novelty. *The Journal of neuroscience : the official*  
805 *journal of the Society for Neuroscience*. 2012;32(22):7528-37.
- 806 8. Downar J, Crawley AP, Mikulis DJ, Davis KD. A cortical network sensitive to stimulus  
807 salience in a neutral behavioral context across multiple sensory modalities. *Journal of*  
808 *neurophysiology*. 2002;87(1):615-20.
- 809 9. Menon V, Uddin LQ. Saliency, switching, attention and control: a network model of insula  
810 function. *Brain Struct Funct*. 2010;214(5-6):655-67.

- 811 10. Crottaz-Herbette S, Menon V. Where and when the anterior cingulate cortex modulates  
812 attentional response: combined fMRI and ERP evidence. *J Cogn Neurosci*. 2006;18(5):766-80.
- 813 11. Downar J, Crawley AP, Mikulis DJ, Davis KD. A multimodal cortical network for the  
814 detection of changes in the sensory environment. *Nat Neurosci*. 2000;3(3):277-83.
- 815 12. Polich J. Updating P300: an integrative theory of P3a and P3b. *Clin Neurophysiol*.  
816 2007;118(10):2128-48.
- 817 13. Fabiani M, Friedman D, Cheng JC. Individual differences in P3 scalp distribution in older  
818 adults, and their relationship to frontal lobe function. *Psychophysiology*. 1998;35(6):698-708.
- 819 14. Parmentier FB, Elford G, Escera C, Andres P, San Miguel I. The cognitive locus of distraction  
820 by acoustic novelty in the cross-modal oddball task. *Cognition*. 2008;106(1):408-32.
- 821 15. Wessel JR, Aron AR. On the Globality of Motor Suppression: Unexpected Events and Their  
822 Influence on Behavior and Cognition. *Neuron*. 2017;93(2):259-80.
- 823 16. Logan GD, Cowan WB. On the Ability to Inhibit Thought and Action: A Theory of an Act of  
824 Control. *Psych Rev*. 1984;91:295-327.
- 825 17. Kok A, Ramautar JR, De Ruiter MB, Band GP, Ridderinkhof KR. ERP components associated  
826 with successful and unsuccessful stopping in a stop-signal task. *Psychophysiology*. 2004;41(1):9-  
827 20.
- 828 18. Wessel JR, Aron AR. It's not too late: the onset of the frontocentral P3 indexes successful  
829 response inhibition in the stop-signal paradigm. *Psychophysiology*. 2015;52(4):472-80.
- 830 19. Onton J, Westerfield M, Townsend J, Makeig S. Imaging human EEG dynamics using  
831 independent component analysis. *Neuroscience and biobehavioral reviews*. 2006;30(6):808-22.

- 832 20. Makeig S, Delorme A, Westerfield M, Jung TP, Townsend J, Courchesne E, et al.  
833 Electroencephalographic brain dynamics following manually responded visual targets. *PLoS Biol.*  
834 2004;2(6):e176.
- 835 21. Brainard DH. The Psychophysics Toolbox. *Spat Vis.* 1997;10(4):433-6.
- 836 22. Delorme A, Makeig S. EEGLAB: an open source toolbox for analysis of single-trial EEG  
837 dynamics including independent component analysis. *J Neurosci Methods.* 2004;134(1):9-21.
- 838 23. Delorme A, Sejnowski T, Makeig S. Enhanced detection of artifacts in EEG data using  
839 higher-order statistics and independent component analysis. *NeuroImage.* 2007;34(4):1443-9.
- 840 24. Bell AJ, Sejnowski TJ. An information-maximization approach to blind separation and blind  
841 deconvolution. *Neural Comput.* 1995;7(6):1129-59.
- 842 25. Lee TW, Girolami M, Sejnowski TJ. Independent component analysis using an extended  
843 infomax algorithm for mixed subgaussian and supergaussian sources. *Neural Comput.*  
844 1999;11(2):417-41.
- 845 26. Delorme A, Palmer J, Onton J, Oostenveld R, Makeig S. Independent EEG sources are  
846 dipolar. *PLoS One.* 2012;7(2):e30135.
- 847 27. Fischer AG, Ullsperger M. Real and fictive outcomes are processed differently but  
848 converge on a common adaptive mechanism. *Neuron.* 2013;79(6):1243-55.
- 849 28. Benjamini Y, Krieger AM, Yekutieli D. Adaptive linear step-up procedures that control the  
850 false discovery rate. *Biometrika.* 2006;93(3):491-507.
- 851 29. Gentsch A, Ullsperger P, Ullsperger M. Dissociable medial frontal negativities from a  
852 common monitoring system for self- and externally caused failure of goal achievement.  
853 *NeuroImage.* 2009;47(4):2023-30.

- 854 30. Wessel JR. Testing Multiple Psychological Processes for Common Neural Mechanisms  
855 Using EEG and Independent Component Analysis. *Brain Topogr.* 2016.
- 856 31. Wessel JR, Ullsperger M. Selection of independent components representing event-  
857 related brain potentials: a data-driven approach for greater objectivity. *NeuroImage.*  
858 2011;54(3):2105-15.
- 859 32. Courchesne E, Hillyard SA, Galambos R. Stimulus novelty, task relevance and the visual  
860 evoked potential in man. *Electroencephalography and clinical neurophysiology.* 1975;39(2):131-  
861 43.
- 862 33. Wessel JR. A Neural Mechanism for Surprise-related Interruptions of Visuospatial  
863 Working Memory. *Cereb Cortex.* 2016.
- 864 34. Novembre G, Pawar VM, Bufacchi RJ, Kilintari M, Srinivasan M, Rothwell JC, et al. Saliency  
865 Detection as a Reactive Process: Unexpected Sensory Events Evoke Corticomuscular Coupling.  
866 *The Journal of neuroscience : the official journal of the Society for Neuroscience.*  
867 2018;38(9):2385-97.
- 868 35. Dutra I, Waller DA, Wessel JR. Perceptual surprise improves action stopping by non-  
869 selectively suppressing motor activity via a neural mechanism for motor inhibition. *The Journal*  
870 *of neuroscience : the official journal of the Society for Neuroscience.* 2018.
- 871 36. Horstmann G. The surprise-attention link: a review. *Ann N Y Acad Sci.* 2015;1339:106-15.
- 872 37. Lynn R. Attention, Arousal and the Orientation Reaction: International Series of  
873 Monographs in Experimental Psychology: Elsevier; 2013.

- 874 38. Wessel JR, Aron AR. Unexpected events induce motor slowing via a brain mechanism for  
875 action-stopping with global suppressive effects. *The Journal of neuroscience : the official journal*  
876 *of the Society for Neuroscience*. 2013;33(47):18481-91.
- 877 39. Horstmann G. Latency and duration of the action interruption in surprise. *Cognition and*  
878 *Emotion*. 2006;20(2):242-73.
- 879 40. Fife KH, Gutierrez-Reed NA, Zell V, Bailly J, Lewis CM, Aron AR, et al. Causal role for the  
880 subthalamic nucleus in interrupting behavior. *Elife*. 2017;6.
- 881 41. Dawson ME, Schell AM, Beers JR, Kelly A. Allocation of cognitive processing capacity  
882 during human autonomic classical conditioning. *J Exp Psychol Gen*. 1982;111(3):273-95.
- 883 42. Berti S, Schroger E. Distraction effects in vision: behavioral and event-related potential  
884 indices. *Neuroreport*. 2004;15(4):665-9.
- 885 43. Parmentier FB, Ljungberg JK, Elsley JV, Lindkvist M. A behavioral study of distraction by  
886 vibrotactile novelty. *J Exp Psychol Hum Percept Perform*. 2011;37(4):1134-9.
- 887 44. Hillyard SA, Teder-Salejarvi WA, Munte TF. Temporal dynamics of early perceptual  
888 processing. *Curr Opin Neurobiol*. 1998;8(2):202-10.
- 889 45. O'Reilly JX, Schuffelgen U, Cuell SF, Behrens TE, Mars RB, Rushworth MF. Dissociable  
890 effects of surprise and model update in parietal and anterior cingulate cortex. *Proc Natl Acad Sci*  
891 *U S A*. 2013;110(38):E3660-9.
- 892 46. Shannon CE. A mathematical theory of communication. *Bell system technical journal*.  
893 1948;27(3):379-423.
- 894 47. Mars RB, Debener S, Gladwin TE, Harrison LM, Haggard P, Rothwell JC, et al. Trial-by-trial  
895 fluctuations in the event-related electroencephalogram reflect dynamic changes in the degree of



- 896 surprise. The Journal of neuroscience : the official journal of the Society for Neuroscience.  
897 2008;28(47):12539-45.
- 898 48. Seer C, Lange F, Boos M, Dengler R, Kopp B. Prior probabilities modulate cortical surprise  
899 responses: A study of event-related potentials. Brain Cogn. 2016;106:78-89.
- 900 49. Behrens TE, Woolrich MW, Walton ME, Rushworth MF. Learning the value of information  
901 in an uncertain world. Nat Neurosci. 2007;10(9):1214-21.
- 902 50. Ullsperger M, Danielmeier C, Jocham G. Neurophysiology of performance monitoring and  
903 adaptive behavior. Physiol Rev. 2014;94(1):35-79.
- 904 51. Rushworth MF, Walton ME, Kennerley SW, Bannerman DM. Action sets and decisions in  
905 the medial frontal cortex. Trends Cogn Sci. 2004;8(9):410-7.
- 906
